# Supplementary material for: A multiobjective closed-loop approach towards autonomous discovery of electrocatalysts for nitrogen reduction
Source: Royal Society of Chemistry journal article supplement (doi:10.1039/d3dd00244f), 2024-01-01
Supplement: d3dd00244f1.pdf [file d3dd00244f1.pdf]

## 8 I. TABULATED PARTIAL SCORES FOR CANDIDATES

| Rank | SAA Candidate      | Ranking Score | $c_j^{\text{active}}$ | $C_j$ | $S_j$ |
|------|--------------------|---------------|-----------------------|-------|-------|
| 1    | Zr <sub>1</sub> Cr | 0.38          | 0.70                  | 0.59  | 0.91  |
| 2    | Hf <sub>1</sub> Cr | 0.35          | 0.76                  | 0.59  | 0.78  |
| 3    | Au <sub>1</sub> Re | 0.27          | 0.62                  | 0.68  | 0.65  |
| 4    | Ti <sub>1</sub> Fe | 0.24          | 0.57                  | 0.89  | 0.47  |
| 5    | Ta <sub>1</sub> Re | 0.19          | 0.50                  | 0.67  | 0.57  |
| 6    | Ru <sub>1</sub> Cr | 0.10          | 0.33                  | 0.57  | 0.55  |

TABLE I. SAA candidates identified through the multi-objective search with predicted activities that fall within the target window. Raw values of each of the three key metrics are given alongside the target values

## 9 II. DATA AND SCRIPTS FOR REPRODUCIBILITY

10 All data and Python scripts required to perform the analysis presented in this work are  
11 made available via the GitHub repository at.

12 The repository is organized as follows:

13 1. data/

14 • `acsl.json`:

15 `autocat.learning.sequential.SequentialLearner` object containing all his-  
16 torical data from the sequential learning search. This may be read using the  
17 `SequentialLearner.from_json` method.

18 • `acds.json`:

19 `autocat.learning.sequential.DesignSpace` object containing all structures  
20 within the design space (with calculated labels where available). This may be  
21 read using the `DesignSpace.from_json` method.

---

\* venkvis@cmu.edu

- 22 ● `dft_data.db`:  
23 `ase.db` containing all of the generated DFT data from the search with en-  
24 tries in the Physical Information File (PIF) format. This may be read using  
25 `ase.db.connect` using `type="json"`
- 26 ● `ELEMENTS.json`:  
27 `json` containing all chemical species considered in this study
- 28 ● `raw_volc_m_b.csv`:  
29 Slopes and intercepts to reproduce the used activity volcano from "The challenge  
30 of electrochemical ammonia synthesis: a new perspective on the role of nitrogen  
31 scaling relations", Montoya et al., *ChemSusChem* **8** (13), 2180-2186 (2015).  
32 DOI: [10.1002/cssc.201500322](https://doi.org/10.1002/cssc.201500322)
- 33 ● `bee_ensembles/`:  
34 Directory containing text files with the BEE energy ensembles for each system  
35 that was autonomously identified during the search

## 36 2. scripts/

- 37 ● `aq_hist_plot/`:
  - 38 – `get_aq_hist.py`:  
39 Script for extracting the acquisition scores and prediction uncertainties as a  
40 function of sequential learning (SL) iteration into a text file
  - 41 – `make_aq_hist_plot.py`:  
42 Script to generate a plot of candidate acquisition scores and uncertainties  
43 against SL iteration.

44 If these scripts are run as-is, will reproduce Figure 3b from the paper.

- 45 ● `drivers/`
  - 46 – `manage_dft_calculations.py`:  
47 Script for managing high-throughput adsorption energy calculations on a  
48 computing cluster using `fireworks`. Will ensure that first the clean slabs  
49 are relaxed before placing the adsorbate.

- 50       – `reference_energies.json`:  
51       Tabulated reference energies used to calculate  $\Delta G_N$  from the DFT total  
52       energies of the relaxed systems.
- 53       – `sl_driver.py`:  
54       Script for driving the guided candidate selection with SL. Will automatically  
55       re-train the machine learning surrogate, re-calculate the acquisition scores,  
56       and suggest the next candidate system for evaluation.
- 57     • `obj_space_hist_plot/`
  - 58       – `extract_obj_space_hist.py`:  
59       Extracts the HHI, Segregation Energies, and  $\Delta G_N$  of both the systems in  
60       the initial training set as well as candidates as a function of SL iteration into  
61       text files.
  - 62       – `make_obj_space_hist_plot.py`:  
63       Script for generating two subplots. First, it will generate a subplot of the  
64       activity volcano with candidates. Second, it will generate a subplot of Nor-  
65       malized HHI against Segregation Energy. Both plots will have candidates  
66       colored based on SL iteration.

67       If these scripts are run as-is, will reproduce Figure 4 from the paper.

- 68     • `rank_score_plot/`
  - 69       – `get_ranking.py`:  
70       Calculates the partial scores ( $c_j^{\text{active}}$ ,  $A_j$ ,  $C_j$ ) and total ranking scores ( $RS_j$ )  
71       for all candidates and extracts the data into a text file
  - 72       – `make_ranking_plot.py`:  
73       Script for generating the ranking plot of the top 5 identified candidates

74       If these scripts are run as-is, will reproduce Figure 5 from the paper

- 75     • `umap_plots/`
  - 76       – `L1_EMBEDDING.txt`:  
77       Contains the UMAP embeddings of all systems in the considered SAA design  
78       space that were used in the paper.

79       – `make_umap_plot_initial_only`:  
80        Script for generating plot of UMAP projection with only the initial training  
81        points highlighted (Figure 1d in the paper)  
82       – `make_umap_plot.py`:  
83        Script for generating plot of UMAP projection with both the initial train-  
84        ing points highlighted alongside the identified candidates as a function of  
85        iteration (Figure 3a in the paper)  
86       – `umap_calc.py`:  
87        Calculate UMAP embeddings for the SAA design space using magpie fea-  
88        turization. **N.B.** due to the stochasticity in the UMAP approach, running  
89        this script as-is does not guarantee identical embeddings to that provided in  
90        L1\_EMBEDDING.txt, but overall trends should remain

### 91    **A. Running the scripts**

92    The required packages for executing the scripts are specified in `requirements.txt`, and  
93 can be installed in a new environment (e.g. using conda) as follows:

```
94 $ conda create -n multi_obj_search python=3.10  
95 $ conda activate multi_obj_search  
96 $ pip install -r requirements.txt
```

97    The scripts are all in python, and can be run from the command line. For example:

```
98 $ cd scripts/aq_hist_plot  
99 $ python get_aq_hist.py
```

## 100 **III. COMPARISON WITH A THRESHOLDS-BASED FILTERING APPROACH**

101    Here, we analyze a common alternate strategy that uses target threshold values to filter  
102 out candidates, instead of an acquisition function that uses an aggregate score (based on ML  
103 predictions and uncertainties) to rank and select candidates sequentially (as presented in the  
104 main text), and its effect on the final top-ranked candidates identified. For this, we leverage  
105 the tabulated HHI and segregation energy data, as well as the DFT-calculated adsorption

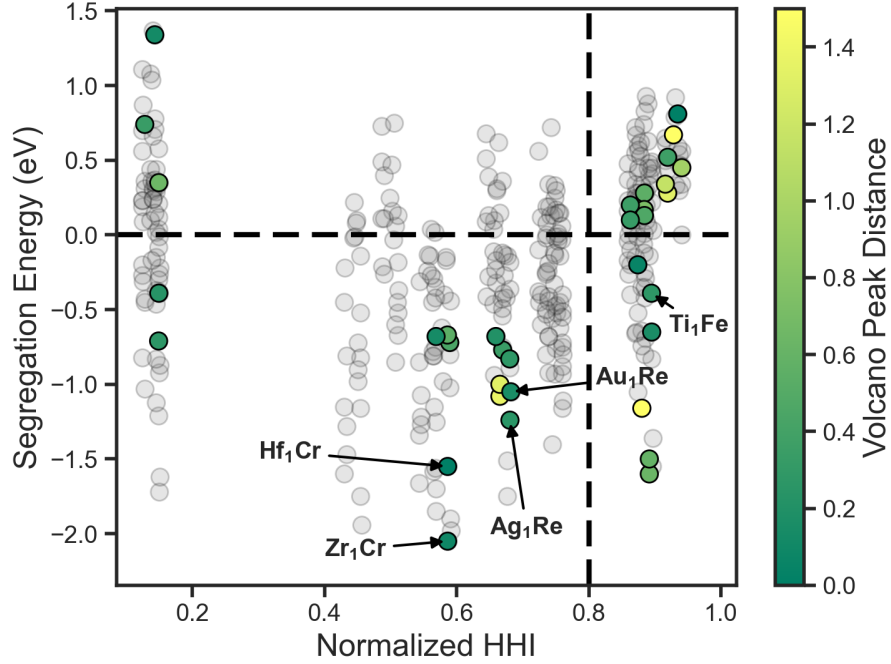

FIG. S1. Normalized HHI and Segregation for entire SAA design space. Colored points, visualizing indicating predicted distance from the volcano peak, are systems evaluated with DFT, either as part of the initial training set or evaluated during the search campaign. The top 5 ranked candidates are explicitly labelled. Dashed lines are arbitrary filtering thresholds used for demonstration purposes. 4 out of the 5 top-ranked candidates would have been missed if these filters were applied before the search campaign.

106 energies computed in this work. FIG. S1 shows the normalized HHI and segregation energies  
 107 for the full SAA design space, as well as distances from the activity volcano peak (for  
 108 evaluated systems). Here we consider two filtering thresholds. Along the segregation energy  
 109 axis we filter out systems above 0 eV as these host-dopant combinations are predicted to  
 110 thermodynamically drive the dopant into the bulk (not preferred). While this threshold of  
 111 0 eV is a natural choice for segregation energy, for other metrics, the selection of a threshold  
 112 can be highly non-trivial and rely on extensive domain knowledge. For example, the choice  
 113 of a threshold value for the HHI axis is not obvious. For demonstration purposes here, we  
 114 filter out systems with HHI below 0.8 (based on the the visual clusters in the data), but  
 115 a reasonable argument can be made for a different value based on the cost targets for a  
 116 particular application.

117 From the combination of the above two filters, 4 out of the top 5 ranked candidate

118 systems previously identified from our search are filtered out. While this does not rule out  
119 the possibility of finding high-quality candidates within the confined region defined by the  
120 target threshold values, it highlights how pre-defined threshold choices can lead to missing  
121 systems that are promising overall. SL frameworks that use scores based on ML predictions  
122 *and* uncertainties to rank and select candidates are not similarly affected.
